# Supplementary material
Source: Springer Nature journal article supplement (https://www.springermedizin.de/resource/supplementary/12891_2014_2170_MOESM3_ESM.pdf/9509558)
Supplement: MOESM3 [file 9509558]

### Head flexion (HF)

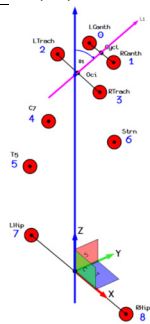

### Neck Flexion (NF)

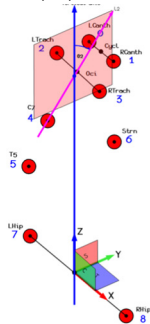

### Cranio-cervical angle (CC)

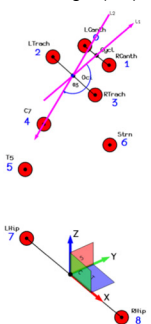

### Trunk Flexion (TF)

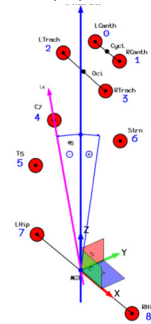

### Head lateral banding (HLB)

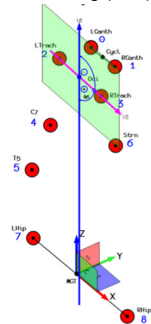

The angle between a line drawn from the Cyclops\* to the OC1† and the vertical axis

The angle between a line drawn from the OC1† to the C7 SP and the vertical axis

The angle between a line drawn from the Cyclops\* to the OC1† to the C7 SP

The angle between a line drawn from the C7 SP to the mid-point of the greater trochanters and the vertical axis.

The lateral angle between a line drawn from the OC1† to the trachus, with the vertical line going through the OC1† (negative to the left)

\*Cyclops: midway between the left and right canthus.

†OC1: Midway between the left and right trachus (approximately at the atlanto-occipital joint)
